# Supplementary material for: History of pre-eclampsia does not appear to be a risk factor for vascular phenotype in women with systemic sclerosis
Source: PubMed Central journal article supplement — RMD Open. 2024 Jan 4;10(1):e003626. doi: 10.1136/rmdopen-2023-003626 (PMC10773441; doi:10.1136/rmdopen-2023-003626), 2024-01-04
Supplement: rmdopen-2023-003626supp001.pdf [file rmdopen-2023-003626supp001.pdf]

**QUESTIONNAIRE « GROSSESSE » de PREVASCLERO RENSEIGNE LE :** | | | | | | | | | |**PARTIE 1 : AUTOQUESTIONNAIRE PREECLAMPSIE (à remplir par la patiente):**

- 1) Prenez-vous actuellement un traitement médicamenteux pour baisser votre tension artérielle ?
- Oui
  - Non
  - Je ne sais pas
- 2) Avez-vous eu au moins une grossesse qui a duré plus de 6 mois :
- Oui
  - Non
- 3) Au cours d'une de ces grossesses (qui a duré plus de 6 mois), est-ce qu'un médecin vous a déjà dit que vous aviez une tension artérielle élevée ou une hypertension ?
- Oui (menu déroulant)
    - Pendant la première grossesse seulement
    - Pas à la première, mais à une grossesse suivante
    - A la première grossesse et au moins à une grossesse suivante
  - Non
    - Au cours de l'une de vos grossesses, avez-vous eu une pré-éclampsie, une éclampsie ou une toxémie ?
      - Oui
      - Non

- 4) En quelle année, ou quel âge aviez-vous, quand la pression artérielle élevée liée à la grossesse a eu lieu pour la première fois ?(
- a. Année \_\_\_\_\_ b. Age \_\_\_\_\_
- 5) Au cours d'une des grossesses où vous avez développé de l'hypertension, avez-vous eu :
- a. Des protéines dans les urines Oui/Non
- b. Des crises d'épilepsie ou des convulsions Oui/Non
- c. Une pré-éclampsie, une éclampsie, ou une toxémie de la grossesse Oui/Non
- 6) Avant la première grossesse au cours de laquelle vous avez développé de l'hypertension, aviez-vous :
- a. Des protéines dans les urines Oui/Non
- b. Des crises d'épilepsie ou des convulsions Oui/Non
- c. Une tension artérielle élevée (hypertension) Oui/Non

**Diagnostic de pré-éclampsie validé par le médecin si réponse positive à la question 2 + à au moins une des questions suivantes : 3, 5 ou 6 : oui/non**

**PARTIE 2 : QUESTIONNAIRE COMPLEMENTAIRE (à remplir par la patiente) :**

1. Combien avez-vous eu d'enfants nés vivants ? : ...
2. avez présenté au moins une fois une pré-éclampsie, une éclampsie ou une toxémie pendant une grossesse,

si oui , merci de répondre aux questions suivantes, pour chaque grossesse concernée.  
Sinon, rendez-vous directement à la question n°3 :

Nombre de grossesses :

**Grossesse n°1 compliquée d'hypertension artérielle :**

- Cela concernait-il une grossesse avant le diagnostic de sclérodémie : oui/non
- S'agissait-il de votre première grossesse?: oui/non
- Aviez-vous une tension artérielle élevée ou une hypertension avant cette grossesse ? oui/non
- A combien de mois de grossesse la pré-éclampsie/éclampsie/toxémie a-t-elle été diagnostiquée? : ...
- Si c'est possible, précisez à combien de semaines de grossesse la pré-éclampsie/éclampsie/toxémie a été diagnostiquée : ...
- Avez-vous accouché avant le terme prévu ? : oui/non
- A combien de mois de grossesse avez-vous accouché ? : ...(borne : à partir de 6 mois)
- Si c'est possible, précisez à combien de semaines de grossesse vous avez accouché : ... (borne : 28 à 43 SA)
- Quel était la date exacte de l'accouchement : ../../....
- S'agissait-il d'une grossesse gémellaire ?

|          | Poids à la naissance (grammes) | Sexe         | Est-il né vivant ? |
|----------|--------------------------------|--------------|--------------------|
| Enfant 1 | bornes : 500 gr à 6 Kg         | garçon/fille | oui/non            |
| Enfant 2 |                                |              |                    |

**Le cas échéant, grossesse n°2 compliquée d'hypertension artérielle** (ne pas tenir compte de ce paragraphe si une seule grossesse était concernée) :

- Cela concernait-il une grossesse avant le diagnostic de sclérodermie : oui/non
- Avez-vous une tension artérielle élevée ou une hypertension avant cette grossesse ?  
oui/non
- A combien de mois de grossesse la pré-éclampsie/éclampsie/toxémie a-t-elle été diagnostiquée ? : ...
- Si c'est possible, précisez à combien de semaines de grossesse la pré-éclampsie/éclampsie/toxémie a été diagnostiquée : ...
- Avez-vous accouché avant le terme prévu ? : oui/non
- A combien de mois de grossesse avez-vous accouché ? : ...
- Si c'est possible, précisez à combien de semaines de grossesse vous avez accouché : ...
- S'agissait-il d'une grossesse gémellaire ?

|          | Poids à la naissance (grammes) | Sexe         | Est-il né vivant ? |
|----------|--------------------------------|--------------|--------------------|
| Enfant 1 | bornes : 500 gr à 6 Kg         | garçon/fille | oui/non            |
| Enfant 2 |                                |              |                    |

**Le cas échéant, grossesse n°3 compliquée d'hypertension artérielle** (ne pas tenir compte de ce paragraphe si une seule grossesse était concernée) :

- Cela concernait-il une grossesse avant le diagnostic de sclérodermie : oui/non
- Avez-vous une tension artérielle élevée ou une hypertension avant cette grossesse ?  
oui/non
- A combien de mois de grossesse la pré-éclampsie/éclampsie/toxémie a-t-elle été diagnostiquée ? : ...
- Si c'est possible, précisez à combien de semaines de grossesse la pré-éclampsie/éclampsie/toxémie a été diagnostiquée : ...
- Avez-vous accouché avant le terme prévu ? : oui/non
- A combien de mois de grossesse avez-vous accouché ? : ...
- Si c'est possible, précisez à combien de semaines de grossesse vous avez accouché : ...
- Quel était la date exacte de l'accouchement : ../../....
- S'agissait-il d'une grossesse gémellaire ?

|          | Poids à la naissance (grammes) | Sexe         | Est-il né vivant ? |
|----------|--------------------------------|--------------|--------------------|
| Enfant 1 | bornes : 500 gr à 6 Kg         | garçon/fille | oui/non            |
| Enfant 2 |                                |              |                    |

3. Si vous n'avez jamais présenté de pré-éclampsie, d'éclampsie ou de toxémie pendant une grossesse, merci de répondre aux questions suivantes :

Si oui, pour la première grossesse qui a duré plus de 6 mois :

- Avez-vous accouché avant le terme prévu ? : oui/non
- A combien de mois de grossesse avez-vous accouché ? : ...
- Si c'est possible, précisez à combien de semaines de grossesse vous avez accouché : ...
- Quel était la date exacte de l'accouchement : ../../....
- S'agissait-il d'une grossesse gémellaire ?

|          | Poids à la naissance (grammes) | Sexe         | Est-il né vivant ? |
|----------|--------------------------------|--------------|--------------------|
| Enfant 1 | bornes : 500 gr à 6 Kg         | garçon/fille | oui/non            |
| Enfant 2 |                                |              |                    |

4. Concernant la/les grossesses évoquées dans ce questionnaire , avez-vous eu au cours de ces grossesses? .....

- Un hématome rétro-placentaire ou un décollement placentaire : oui/ non/ je ne sais pas
- Un retard de croissance intra-utérin (fœtus qui ne grossissait plus ou moins) :  
oui/ non/ je ne sais pas
- Une Cholestase gravidique : oui/ non/ je ne sais pas
- Autres : champs libre
