# Supplementary material for: History of pre-eclampsia does not appear to be a risk factor for vascular phenotype in women with systemic sclerosis
Source: PubMed Central journal article supplement — RMD Open. 2024 Jan 4;10(1):e003626. doi: 10.1136/rmdopen-2023-003626 (PMC10773441; doi:10.1136/rmdopen-2023-003626), 2024-01-04
Supplement: rmdopen-2023-003626supp002.pdf [file rmdopen-2023-003626supp002.pdf]

**Table S1.** Pregnancy history of participants

| Parameters                                                                         |                | Total (n=378)    | Control (n=249)  | Case (n=129)     | p*   |
|------------------------------------------------------------------------------------|----------------|------------------|------------------|------------------|------|
| Age at first pregnancy of more than 28 WG before SSc diagnosis (years)             | Mean ± SD      | 25.7 +/- 4.9     | 25.9 +/- 4.9     | 25.3 +/- 4.9     | 0.30 |
|                                                                                    | Median (q1-q3) | 25.0 (22.0-28.0) | 25.0 (23.0-28.0) | 24.0 (22.0-28.0) |      |
|                                                                                    | min-max        | 16.0-47.0        | 16.0-47.0        | 16.0-41.0        |      |
| Time between first pregnancy of more than 28 WG and SSc diagnosis (years)          | Mean ± SD      | 26.6 +/- 14.0    | 28.0 +/- 14.0    | 24.2 +/- 13.7    | 0.02 |
|                                                                                    | Median (q1-q3) | 26.0 (16.0-36.0) | 27.0 (18.0-38.0) | 23.0 (14.0-33.0) |      |
|                                                                                    | min-max        | 0.0-66.0         | 0.0-66.0         | 1.0-54.0         |      |
| Time between first pregnancy of more than 28 WG and inclusion in the study (years) | Mean ± SD      | 36.0 +/- 14.3    | 35.9 +/- 14.6    | 36.1 +/- 13.8    | 0.93 |
|                                                                                    | Median (q1-q3) | 37.5 (25.0-47.0) | 37.0 (26.0-46.0) | 39.0 (25.0-47.0) |      |
|                                                                                    | min-max        | 1.0-68.0         | 1.0-68.0         | 2.0-62.0         |      |
| Number of live births                                                              | Median (q1-q3) | 2 (2-3)          | 2 (2-3)          | 2 (2-3)          | 0.07 |
|                                                                                    | Min-max        | 1-5              | 1-5              | 1-5              |      |
| History of pre-eclampsia                                                           | n (%)          | 17 (4.5%)        | 12 (4.8%)        | 5 (3.9%)         | 0.67 |
| Term at pre-eclampsia diagnosis (months)                                           | Mean ± SD      | 6.5 ± 1.4        | 6.1 ± 1.4        | 7.5 ± 1.1        | 0.06 |
|                                                                                    | Median (q1-q3) | 6.0 (6.0-8.0)    | 6.0 (6.0-7.0)    | 7.5 (7.0-8.0)    |      |
|                                                                                    | min-max        | 3.0-9.0          | 3.0-8.0          | 6.0-9.0          |      |
| Term at delivery in pregnancies complicated with pre-eclampsia (months)            | Mean ± SD      | 7.9 ± 1.0        | 7.9 ± 1.0        | 7.8 ± 1.2        | 0.97 |
|                                                                                    | Median (q1-q3) | 8.0 (8.0-9.0)    | 8.0 (8.0-9.0)    | 8.0 (7.0-9.0)    |      |
|                                                                                    | min-max        | 6.0-9.0          | 6.0-9.0          | 6.0-9.0          |      |
| Weight of newborn in pregnancies complicated with pre-eclampsia (grams)            | Mean ± SD      | 2461 +/- 1008    | 2760 +/- 949     | 1861 +/- 884     | 0.04 |
|                                                                                    | Median (q1-q3) | 2610 (1380-3200) | 3000 (2600-3320) | 1800 (1200-1960) |      |
|                                                                                    | min-max        | 765-4460         | 765-4460         | 1000-3800        |      |
| History of vasculo-placental disorder                                              | n (%)          | 33 (9.4%)        | 21 (9.1%)        | 12 (10.0%)       | 0.77 |
| History of placental abruption                                                     | n (%)          | 6 (1.7%)         | 4 (1.7%)         | 2 (1.7%)         | 1.0  |
| History of IUGR                                                                    | n (%)          | 13 (3.6%)        | 9 (3.8%)         | 4 (3.2%)         | 1.0  |

SSc = systemic sclerosis; WG = weeks of gestation; IUGR = intrauterine growth restriction

**Table S2.** Univariable analysis for parameters associated with a vascular phenotype of SSc

| <b>Parameters</b>                                    | <b>Odds Ratio</b> | <b>Confidence interval</b> | <b>p-Value</b> | <b>Number of observations</b> |
|------------------------------------------------------|-------------------|----------------------------|----------------|-------------------------------|
| Smoking status                                       | 1.13              | 0.73 to 1.76               | 0.59           | 376                           |
| Chronic arterial hypertension                        | 1.49              | 0.93 to 2.38               | 0.10           | 378                           |
| History of pre-eclampsia                             | 0.80              | 0.27 to 2.31               | 0.68           | 378                           |
| History of vasculo-placental disorder                | 1.12              | 0.53 to 2.35               | 0.77           | 352                           |
| Age at SSc diagnosis (years)*                        | 0.97              | 0.96 to 0.99               | 0.003          | 371                           |
| Disease duration (years)*                            | 1.04              | 1.02 to 1.07               | 0.0009         | 371                           |
| Disease duration $\geq$ 5 years                      | 2.50              | 1.53 to 4.08               | 0.0003         | 371                           |
| Type of SSc (diffuse versus limited/sine sclerodema) | 1.85              | 1.10 to 3.12               | 0.02           | 378                           |
| Rodnan skin score (points)*                          | 1.11              | 1.06 to 1.15               | <0.0001        | 351                           |
| Anti-topoisomerase antibodies                        | 2.25              | 1.31 to 3.87               | 0.003          | 338                           |
| Anti-RNA polymerase III antibodies                   | 0.87              | 0.29 to 2.56               | 0.80           | 336                           |
| Anti-centromere antibodies                           | 0.57              | 0.36 to 0.90               | 0.01           | 338                           |
| Persistent antiphospholipid antibodies               | 2.03              | 0.69 to 5.92               | 0.20           | 353                           |
| Interstitial lung disease                            | 1.97              | 1.25 to 3.11               | 0.003          | 378                           |
| Lower digestive tract involvement                    | 1.64              | 0.99 ; 2.72                | 0.05           | 378                           |

SSc = systemic sclerosis
